1 **Running Title:** Prevalence, popularity and volatility of congenital heart diseases in dogs  
2 **CLINICAL EPIDEMIOLOGY OF CONGENITAL HEART DISEASES IN DOGS:**  
3 **PREVALENCE, POPULARITY AND VOLATILITY THROUGHOUT TWENTY**  
4 **YEARS OF CLINICAL PRACTICE**

5 Brambilla PG<sup>1\*</sup>, Polli M<sup>1</sup>, Pradelli D<sup>2</sup>, Papa M<sup>2</sup>, Rizzi R<sup>1</sup>, Bagardi M<sup>1</sup>, Bussadori C<sup>2</sup>

6 <sup>1</sup>Department of Veterinary Medicine, University of Milan, Via dell'Università n. 6, 26900 Lodi (LO) - Italy

7 <sup>2</sup>Department of Cardiology, Clinica Veterinaria Gran Sasso, Milan, Italy

8

9

10

11

12 \*Corresponding Author

13 E-mail: [paola.brambilla@unimi.it](mailto:paola.brambilla@unimi.it)

14 Orcid number: 0000-0003-4255-555X

15

16

17

18 Conflict of interest

19 The authors declare no conflict of interests

20

21

## 22 **Abstract**

23 The epidemiology of Congenital Heart Diseases (CHDs) has changed over the past twenty years.  
24 Evaluate the prevalence of CHDs in the population of dogs recruited in a single RC (referral center); compare the  
25 epidemiological features of CHDs in not screened (French and English Bulldogs and German Shepherds) and  
26 screened (Boxers) dogs; determine the association of breeds with the prevalence of CHDs; determine the  
27 popularity and volatility of breeds; and analyze the trends of the most popular breeds in the overall population  
28 of puppies registered in the Italian Kennel Club from 1st January 1997 to 31st December 2017.  
29 A total of 1,779 clinical records fulfilled the inclusion criteria  
30 Retrospective observational study. The relationship between the breed popularity, volatility and the presence of  
31 CHD was studied.  
32 The most common CHDs were PS (pulmonic stenosis), PDA (patent ductus arteriosus), SAS (subaortic stenosis)  
33 and VSD (ventricular septal defect). The most represented purebreds were Boxer, German Shepherd, French  
34 Bulldog, English Bulldog. Chihuahuas, American Staffordshire Terriers, Border Collies, French Bulldogs, and  
35 Cavalier King Charles Spaniel showed a high value of volatility.  
36 Evident is the value of the screening program implemented in Boxers. Fashions and trends influence dog owners'  
37 choices more than the health problems frequently found in a breed. An effective breeding program is needed to  
38 control the diffusion of CHDs without impoverishing the genetic pool; dog owners should be educated, and the  
39 breeders supported by a network of veterinary cardiology centers.

40

41

## 42 **Introduction**

43

44 Congenital anomalies of the cardiovascular system are defects present at birth, and often lead to perinatal death  
45 in dogs. However, in some cases, congenital heart diseases are asymptomatic and undetected until later in life,  
46 so the percentage of dogs with congenital heart diseases that survive to adulthood to breed can be rather high.

47 To decrease the incidence of CHDs in the dog population as a whole, the early identification of affected dogs  
48 could inform a breeding program. Furthermore, some of the most common CHDs could be successfully treated  
49 by surgical management, and an early diagnosis can help to provide a normal life expectancy compared to that  
50 of the untreated dogs [1]. Knowing the epidemiology of CHDs plays an important role in maintaining dog health  
51 and in preventing the diffusion of CHDs in the dog population.

52 Epidemiological studies on congenital heart disease in dogs have been conducted all over the world since the  
53 early 1960s [2,3].

54 The most valuable studies were performed in the USA, Australia, the UK, Switzerland, Sweden and Italy [4-9].

55 The main studies report different prevalence of CHDs in the affected breeds, depending on the popularity of the  
56 breed in a country in a given period of time [10-12]. In almost all studies, the most common CHDs observed were  
57 PDA, PS, and SAS [1-9]. VSD, TD and TOF have also been described by the authors of these studies, but they are  
58 not noted as frequently as the abovementioned CHDs [2,3,5,7,8].

59 In 2011, a retrospective epidemiological study on CHDs was performed in Italy by Oliveira et al. The included  
60 data were collected at a single veterinarian referral center for cardiovascular disease in small animals, specializing  
61 in the surgical and interventional treatment of congenital heart diseases. Since 1997, the RC, IBC and FSA have  
62 also been included in a screening program that aims to reduce the prevalence of PS and SAS in Boxers, such that  
63 many breeding dogs have been screened for these conditions before breeding.

64 In the last seven years, new CHDs clinical cases have been reported, and this phenomenon provided a worthy  
65 opportunity to evaluate the epidemiology of CHDs in a large population of dogs in the same RC over a longer  
66 period of time.

67 The aims of our study were to assess the prevalence of CHDs in the population of dogs recruited in a single RC  
68 and to analyze the trends of the most popular dog breeds in the overall population of the puppies registered in  
69 the ENCI database from 1st January 1997 to 31st December 2017 [13].

70 The clinic's database was updated and reanalyzed in order to investigate any changes in the epidemiological  
71 features of congenital heart diseases in non-screened (French Bulldog, English Bulldog and German Shepherd)

72 and screened (Boxer) dogs, to determine the association of the breed with CHD and to study the popularity and  
73 volatility of the breeds over this 20-year period.

74

## 75 **Materials and Methods**

76 The medical records of dogs referred for congenital heart disorders to Clinica Veterinaria Gran Sasso between 1<sup>st</sup>  
77 January 1997 to 31<sup>st</sup> December 2017 were retrospectively reviewed.

78 The population affected by CHDs was organized in two spreadsheets (isolated and associated). Dogs affected by  
79 one CHD were included in the isolated Congenital Heart Disease group, and dogs with two or more concurrent  
80 defects were included in the associated Congenital Heart Disease group.

81 In this study, TOF was included in the group with isolated defects, because the pathology was considered as a  
82 unique entity.

83 The breeds with more than 20 dogs each and the defects diagnosed in more than 10 subjects were included.

84 The breeds with fewer than 20 dogs and the CHD with fewer than 10 animals each were named as “others”.

85 Subaortic stenosis Type 1, Type 2 and Type 3 were pooled in the SAS category, whereas pulmonic stenosis type  
86 A, Type B, Type M, Type BHG, Type MHG and PS R2ACA were included in the PS group [14-23].

87 The crossbred dogs were considered as a single group. The unknown phenotypic features of the dogs and the  
88 missing information on age and/or weight at presentation did not allow a categorization into small, medium and  
89 large breeds.

90 The inclusion criteria were dogs affected by CHD with complete clinical records (signalment, history, and physical  
91 examination), including thoracic radiography and echocardiography without sedation. The angiography and  
92 postmortem examination were not executed in all cases. The diagnosis of CHD was obtained by a complete  
93 transthoracic echocardiographic examination (TTE), which was performed in all patients. TTEs were carried out  
94 using commercial ultrasound equipment with mechanical transducers ranging from 2 to 10 MHz (Caris, Esaote,  
95 Florence, Italy), and then using ultrasound machines with electronic transducers also ranging from 2 to 10 MHz

96 (Megas Esaote, Florence, Italy; Mylab30Vet, Esaote, Florence, Italy; MyLab60, Esaote, Florence, Italy, Epiq 7  
97 Philips S.p.A., Milan, Italy).

98 Two-dimensional transesophageal echocardiography (TEE 2D) was executed using an omniplane  
99 transesophageal probe (Mylab30Vet, Esaote, Florence, Italy) ranging from 3 to 8 MHz Three-dimensional TEEs  
100 were performed with an echocardiography machine equipped with an omniplane transesophageal probe x7  
101 matrix ranging from 2 to 7 MHz (Philips IE33, S.p.A., Milan, Italy) when indicated and authorized by the owner.

102 The exams were performed, interpreted and/or reviewed by an ECVIM board-certified cardiologist (C.B.). The  
103 patients were placed in right and left lateral recumbency, and the examinations were performed according to  
104 the American Society of Echocardiography standards and guidelines and other published recommendations [24].

105 Angiographic procedures were also performed and/or reviewed by an ECVIM board-certified cardiologist (C.B.)  
106 with a fluoroscopy system in cases undergoing interventional percutaneous procedures or when necessary for  
107 diagnostic purposes (Villa Sistemi Medicali S.p.A., Buccinasco (MI), Italy and Digital Fluoroscopy system Philips  
108 Veradius, Milan, Italy). Postmortem examinations were performed under the supervision of C.B.

109 The exclusion criteria were dogs with incomplete clinical records or that were affected by acquired heart disease.  
110 The prevalence, the popularity and the volatility of the most common breeds were evaluated by using the cohort  
111 of the puppies registered in ENCI database from January 1997 to December 2017.

112

## 113 **Statistical Analysis**

114 Two datasets were available for statistical analyses, and the descriptive statistics were calculated. The  
115 Kolmogorov-Smirnov test was used to assess normality of the continuous variables. For data that were not  
116 normally distributed, median and interquartile ranges (I/Q: lower and upper quartiles) are given. The Kruskal-  
117 Wallis test was used to evaluate the significance of the association among the most common CHDs and the age  
118 at presentation. The frequency distributions of all diseases in the overall sample for sex was calculated. The  $\chi^2$   
119 test was used to compare the occurrence of each CHD in males and females both of purebreds and crossbreds.

120 The combinations of the observed heart defects were analyzed as groups of two, three, four and five CHDs,  
121 except TOF, which was considered separately when detected alone.

122 The trend of the most common CHDs found in our population from 1997 to 2017 were evaluated in single breeds  
123 (French Bulldog, English Bulldog, Boxer, and German Shepherd) and in groups of breeds (brachycephalic breeds  
124 and the most represented large breeds). The years were pooled in 7 periods for a better description of the CHDs  
125 trend: 1997-1999, 2000-2002, 2003-2005, 2006-2008, 2009-2011, 2012-2014, and 2015-2017. For each CHD,  
126 dogs were considered 'positive' or 'negative' if they were affected or were not affected by that CHD, respectively.  
127 The risk of finding dogs with a determined CHD in a specific period and for a specific breed can be estimated by  
128 the following generalized linear model

129 
$$E[Y | \gamma] = X\beta + \varepsilon$$

130 where Y is the vector of observations,  $\beta$  is the vector of the fixed effect (breed \* period interaction) and  $\text{var}[\varepsilon]$   
131 =  $\text{var}[Y|\gamma]$ . This model, applied to a binomial distribution, provides the least square means and the relative  
132 confidence intervals on a logit scale; the least square means can be reported to the probability scale by the  
133 following equation:

134 
$$\text{logit}(p) = \ln\left(\frac{p}{1-p}\right) = \ln(p) - \ln(1-p)$$

135 This equation can be rearranged as:

136 
$$p = \frac{e^{\text{logit}}}{1 + e^{\text{logit}}}$$

137 The Clinica Gran Sasso internal CHDs database was merged with the ENCI database in order to estimate the odds  
138 ratios of the overall CHD. Contingency tables were constructed for the relationships between overall CHD and  
139 each breed. The magnitude of the relationship was expressed as the odds ratio and relative 95% CI with  
140 associated P-value.

141 To investigate the association of CHD and the breeds' popularity, the Pearson correlation coefficients were  
142 estimated for the total number of CHDs detected in each breed, the OR of overall CHD were determined, and  
143 two measures of breed popularity were calculated as reported by Ghirlanda et al. [10]:

144

145 1) Total popularity, defined as the total number of registrations for each breed in 1997-2017:

146 
$$t_i = \sum_{k=1997}^{2017} p_{i,k}$$

147 2) Volatility, defined as the average relative change in registrations from one year to the next:

148 
$$v_i = \frac{1}{21} \sum_{k=1997}^{2017} \left| \frac{p_{i,k} - p_{i,k-1}}{p_{i,k}} \right|$$

149 where:

150  $t_i$  = popularity of the  $i^{\text{th}}$  breed;

151  $v_i$  = volatility of the  $i^{\text{th}}$  breed;

152  $p_{i,k}$  = number of dogs of the  $i^{\text{th}}$  breed registered in IKC in a year  $k$  ( $1997 \leq k \leq 2017$ )

153 21 = the number of registration changes in the period 1997-2017

154 For all analyses, statistical significance was set to the 5% level.

155 Statistical analyses were performed using the GLIMMIX, FREQ, MEANS and UNIVARIATE SAS® procedures (SAS  
156 Institute Inc. Base SAS® 9.4 Procedures Guide: Statistical Procedures, Second Edition. Cary, NC: SAS Institute Inc.  
157 2013).

## 158 Results and Discussion

159 This retrospective study was based on the 1,779 clinical records that fulfilled the inclusion criteria. Single cardiac  
160 defects were present in 1,568 dogs (88.14%), and 2 or more concurrent defects were found in 211 dogs (11.86%).  
161 The total observed cases of congenital heart defects are reported in Table 1, including information on sex and  
162 age at presentation.

bioRxiv preprint doi: <https://doi.org/10.1101/2020.02.25.964262>; this version posted February 25, 2020. The copyright holder for this preprint (which was not certified by peer review) is the author/funder, who has granted bioRxiv a license to display the preprint in perpetuity. It is made available under aCC-BY 4.0 International license.

| CHD <sub>s</sub>    | TOTAL |       | ISOLATED |      | ASSOCIATED |       | MALE     |            |       |      | FEMALE   |            |       |      | AGE (months)                                      |
|---------------------|-------|-------|----------|------|------------|-------|----------|------------|-------|------|----------|------------|-------|------|---------------------------------------------------|
|                     | N     | %     | N        | %    | N          | %     | ISOLATED | ASSOCIATED | TOTAL | %    | ISOLATED | ASSOCIATED | TOTAL | %    | Q <sub>2</sub> (Q <sub>1</sub> – Q <sub>3</sub> ) |
| PS                  | 689   | 34.1  | 570      | 82.7 | 119        | 17.3  | 339      | 67         | 406   | 58.9 | 231      | 52         | 283   | 41.1 | 10 (5 - 24)                                       |
| PDA                 | 534   | 26.4  | 490      | 71.1 | 44         | 8.2   | 156      | 15         | 171   | 32.0 | 334      | 29         | 363   | 68.0 | 7 (3 - 20.5)                                      |
| SAS                 | 296   | 14.6  | 220      | 31.9 | 76         | 25.7  | 139      | 44         | 183   | 61.8 | 81       | 32         | 113   | 38.2 | 12.5 (4 - 31)                                     |
| VSD                 | 98    | 4.8   | 39       | 5.7  | 59         | 60.2  | 21       | 33         | 54    | 55.1 | 18       | 26         | 44    | 44.9 | 8 (4 - 20.5)                                      |
| AS                  | 95    | 4.7   | 80       | 11.6 | 15         | 15.8  | 54       | 7          | 61    | 64.2 | 26       | 8          | 34    | 35.8 | 25 (10 - 81)                                      |
| TD                  | 69    | 3.4   | 51       | 7.4  | 18         | 26.1  | 26       | 8          | 34    | 49.3 | 25       | 10         | 35    | 50.7 | 10 (6 - 28)                                       |
| ASD                 | 42    | 2.1   | 21       | 3.0  | 21         | 50.0  | 10       | 3          | 13    | 31.0 | 11       | 18         | 29    | 69.0 | 15 (7 – 35)                                       |
| DCRV                | 37    | 1.8   | 21       | 3.0  | 16         | 43.2  | 14       | 9          | 23    | 62.2 | 7        | 7          | 14    | 37.8 | 6 (4 - 11)                                        |
| MD                  | 32    | 1.6   | 27       | 3.9  | 5          | 15.6  | 15       | 5          | 20    | 62.5 | 12       | 0          | 12    | 37.5 | 8 (4 - 17.5)                                      |
| TOF                 | 21    | 1.0   | 0        | 0.0  | 21         | 100.0 | 0        | 11         | 11    | 52.4 | 0        | 10         | 10    | 47.6 | 5 (3 - 9)                                         |
| rPDA                | 15    | 0.7   | 15       | 2.2  | 0          | 0.0   | 6        | 0          | 6     | 40.0 | 9        | 0          | 9     | 60.0 | 11 (5 - 29)                                       |
| MVS                 | 12    | 0.6   | 6        | 0.9  | 6          | 50.0  | 4        | 4          | 8     | 66.7 | 2        | 2          | 4     | 33.3 | 26.5 (3 - 76)                                     |
| BAV                 | 10    | 0.5   | 5        | 0.7  | 5          | 50.0  | 3        | 5          | 8     | 80.0 | 2        | 0          | 2     | 20.0 | 14 (2 - 26)                                       |
| PLCVC               | 10    | 0.5   | 0        | 0.0  | 10         | 100.0 | 0        | 6          | 6     | 60.0 | 0        | 4          | 4     | 40.0 | 6.5 (4 - 21)                                      |
| AVCD                | 10    | 0.5   | 5        | 0.7  | 5          | 50.0  | 0        | 1          | 1     | 10.0 | 5        | 4          | 9     | 90.0 | 14 (10 - 47)                                      |
| others <sup>a</sup> | 52    | 2.6   | 18       | 2.6  | 34         | 65.4  | 6        | 14         | 20    | 38.5 | 12       | 20         | 32    |      | 10 (4 – 54)                                       |
|                     | 2022  | 100.0 | 1568     |      | 454        |       | 793      | 232        | 1025  |      | 775      | 222        | 997   |      |                                                   |

163

164 **Table 1. Congenital heart defects**

165

166 Legend: CHDs, congenital heart diseases; PS, pulmonic stenosis; PDA, patent ductus arteriosus; SAS, sub-aortic

167 stenosis; VSD, ventricular septal defect; AS, aortic stenosis; TD, tricuspid dysplasia; ASD, atrial septal defect;

168 DCRV, double chamber right ventricle; MD, mitral valve dysplasia; TOF, Tetralogy of Fallot; rPDA, reverse

169 patent ductus arteriosus; MVS, mitral valve stenosis; BAV, aortic bicuspid valve; PLCVC, persistent left cranial

170 vena cava; AVCD, atrioventricular canal disease;



171 others<sup>a</sup> CTD, cor triatriatum dexter; AVF, aortovenous fistula; PPDH, pericardial peritoneum diaphragmatic  
172 hernia; QAV, quadricuspid aortic valve; AH, aortic hypoplasia; AI, aortic insufficiency; AOr, aortic overriding;  
173 APW, aortopulmonary window; MI, mitral insufficiency; TVS, tricuspid stenosis; TA, truncus arteriosus; CollF,  
174 systemic to pulmonary arterial collateral flow; AC, azygos continuation; ACT, anomalous coronary truncus.

175 The most common CHD in our overall population, both isolated and associated with other conditions, were PS  
176 (34.1%), PDA (26.4%) SAS (14.6%), VSD (4.8%), AS (4.7%), TD (3.4%), ASD (1.9%), DCRv (1.8%), MD (1.6%), and  
177 rPDA (0.7%). Among these CHDs, the youngest dogs at presentation were affected by TOF (median 5 month) and  
178 the oldest by AS (median 25 months) (Table 1). The results from the Kruskal-Wallis test showed that the dogs  
179 diagnosed with AS were significantly older than the dogs affected by PDA, PS, AS, DCRV, VSD, SAS, TD, and TOF  
180 (Fig 1).

#### 181 Figure 1 – Average age (months) of the dogs belonging to the most represented isolated CHDs

182 Isolated congenital heart diseases were diagnosed in 1,377 dogs belonging to 92 purebreds and 191 crossbreds.  
183 The top 21 represented purebreds were Boxer (19.4%), German Shepherd (9.4%), French Bulldog (6.2%), English  
184 Bulldog (4.9%), Maltese (3.7%), Newfoundland (3.1%), Golden Retriever (3.0%), Chihuahua (2.8%), Rottweiler  
185 (3.1%), Poodle (2.5%), Cavalier King Charles Spaniel (2.2%), American Staffordshire Terrier (2.1%), Labrador  
186 Retriever (2.3%), Dobermann (2.1%), Miniature Pinscher (2.0%), Cocker Spaniel (2.0%), Yorkshire Terrier (1.7%),  
187 Dogue de Bordeaux (1.6%), Dachshund (1.6%), and Bull Terrier (1.5%).

188 Of the most common CHDs found in the selected breeds, PDA was absent in Boxers, American Staffordshire  
189 Terriers and Dogue de Bordeaux. However, the same breeds experienced a large percentage of cases of PS (Boxer  
190 and American Staffordshire Terrier) and SAS (Dogue the Bordeaux) (Table 2) [25,26].

191

192

193

194

195

196

197

198

199

200 **Table 2. Distribution of CHDs in purebreeds and in crossbreeds**

| Breed                         | PS   | PDA  | SAS  | AS   | TD   | VSD  | MD   | DCRV | ASD | rPDA | other CHDs <sup>a</sup> |
|-------------------------------|------|------|------|------|------|------|------|------|-----|------|-------------------------|
| Boxer                         | 34.8 | -    | 37.5 | 19.9 | 3.0  | 0.4  | 0.4  | 0.4  | 2.6 | -    | 1.1                     |
| German shepherd               | 8.5  | 65.9 | 14.0 | 3.1  | 4.7  | -    | -    | -    | 0.8 | -    | 3.1                     |
| French Bulldog                | 82.6 | 4.7  | -    | 3.5  | -    | 7.0  | 1.2  | 1.2  | -   | -    | -                       |
| English Bulldog               | 88.1 | 1.5  | 1.5  | 1.5  | 4.5  | -    | -    | -    | -   | -    | 3.0                     |
| Maltese dog                   | 5.9  | 76.5 | -    | -    | -    | 5.9  | 2.0  | -    | -   | 9.8  | -                       |
| Newfoundland                  | 11.9 | 42.9 | 38.1 | -    | 4.8  | -    | -    | -    | -   | -    | 2.4                     |
| Rottweiler                    | 23.8 | 7.1  | 45.2 | 2.4  | 2.4  | -    | 4.8  | 2.4  | 2.4 | -    | 9.5                     |
| Golden retriever              | 29.3 | 7.3  | 31.7 | 2.4  | 14.6 | -    | 4.9  | 9.8  | -   | -    | -                       |
| Chihuahua                     | 25.6 | 59.0 | -    | -    | -    | 2.6  | -    | 10.3 | -   | 2.6  | -                       |
| Poodle                        | 20.0 | 65.7 | -    | -    | 5.7  | 2.9  | -    | -    | 2.9 | 2.9  | -                       |
| Labrador retriever            | 6.5  | 22.6 | 12.9 | -    | 35.5 | 3.2  | 6.5  | -    | 3.2 | 3.2  | 6.5                     |
| Cavalier King Charles         | 40.0 | 60.0 | -    | -    | -    | -    | -    | -    | -   | -    | -                       |
| American Staffordshire        | 86.2 | -    | -    | 3.5  | -    | -    | 6.9  | 3.5  | -   | -    | -                       |
| Dobermann                     | 3.5  | 89.7 | -    | -    | -    | -    | -    | -    | 3.5 | -    | 3.5                     |
| Miniature Pinscher            | 96.4 | 3.6  | -    | -    | -    | -    | -    | -    | -   | -    | -                       |
| Cocker Spaniel                | 59.3 | 37.0 | -    | -    | -    | -    | -    | -    | -   | -    | 3.7                     |
| Yorkshire terrier             | 30.4 | 47.8 | -    | -    | -    | 8.7  | 4.4  | -    | 4.4 | -    | 4.4                     |
| Border Collie                 | 4.6  | 59.1 | -    | -    | -    | 18.2 | -    | -    | 4.6 | -    | 13.6                    |
| Dachshund                     | 9.1  | 68.2 | 4.6  | -    | -    | 4.6  | 4.6  | -    | -   | -    | 9.1                     |
| Dogue de Bordeaux             | 4.6  | -    | 72.7 | 4.6  | 9.1  | -    | -    | -    | -   | -    | 9.1                     |
| Bull Terrier                  | -    | 5.0  | 15.0 | 30.0 | 5.0  | -    | 30.0 | 5.0  | -   | -    | 10.0                    |
| other purebreeds <sup>b</sup> | 39.3 | 36.3 | 7.5  | 3.1  | 2.4  | 4.1  | 2.0  | 2.0  | 1.0 | 1.4  | 1.0                     |
| Crossbreeds                   | 41.4 | 42.9 | 2.6  | 1.1  | 1.1  | 3.7  | 1.1  | 1.1  | 1.1 | 1.6  | 2.6                     |

201 Legend: CHDs, congenital heart diseases; PS, pulmonic stenosis; PDA, patent ductus arteriosus; SAS, sub-aortic  
202 stenosis; AS, aortic stenosis; TD, tricuspid dysplasia; VSD, ventricular septal defect; MD, mitral valve dysplasia;  
203 DCRV, double chamber right ventricle; ASD, atrial septal defect; rPDA, reverse patent ductus arteriosus;  
204 <sup>a</sup> MVS, mitral valve stenosis; BAV, aortic bicuspid valve; AVCD, atrioventricular canal disease; CTD, cor  
205 triatriatum dexter; AVF, aortovenous fistula; PPDH, pericardial peritoneum diaphragmatic hernia; QAV,  
206 quadricuspid aortic valve; AH, aortic hypoplasia; AI, aortic insufficiency; AOr, aortic overriding; APW,  
207 aortopulmonary window; MI, mitral insufficiency; TVS, tricuspid stenosis; TA, truncus arteriosus; CollF,  
208 systemic to pulmonary arterial collateral flow; AC, azygos continuation; ACT, anomalous coronary truncus;  
209 <sup>b</sup> West Highland white terrier; German Spitz; Corso Dog; Beagle; Jack Russel; Schnauzer; English setter; Pitbull;  
210 Australian Shepherd; Fox Terrier; Bernese mountain dog; Bolognese; Pembroke Welsh Corgi; Belgian shepherd;  
211 Greyhound; Shi tzu; Epagneul Breton; Pug; Swiss shepherd; Weimaraner; Akita Inu; Bichon Frisè; Bullmastiff;  
212 Great Dane; Italian Segugio; Shiba Inu; Czechoslovakian Wolfdog; Greater Swiss Mountain Dog; Neapolitan  
213 Mastiff; Pekingese dog; Pyrenean Mountain Dog; Basset hound; Bergamasco shepherd; Bobtail; Chow Chow;  
214 Dogo Argentino; Griffon Blue de Guascogne; Hungarian Bracco; Irish setter; Italian Greyhound; Italian shepherd  
215 dog; Lagotto; Maremma Sheepdog; Miniature Schnauzer; Pointer; Samoyed; Shetland Sheepdog; Welsh Terrier;  
216 Whippet; Alaskan Malamute; Appenzeller Mountain dog; Bavarian Mountain dog; Cairn Terrier; Cirneco  
217 dell'Etna; Dalmatian; Flat Coat retriever; Irish terrier; Italian Bracco; Jagd terrier; Karst shepherd; Lancashire  
218 Heeler; Magyar Agar; Norfolk terrier; Parson Russel terrier; Perro de Agua; Podenco ibicenco; Rhodesian  
219 Ridgeback; Scottish shepherd; Shar Pei; Spinone; Saint Bernard Dog.  
220  
221 PDA was frequently found in Dobermanns, German Shepherds, Maltese and Dachshunds (Table 2). A small  
222 percentage of breeds experienced rPDA, and it was mostly detected in Maltese (9.8%) (Table 2).  
223 In addition to Boxers, PS was very common in other brachycephalic breeds, including French and English Bulldogs.  
224 Interestingly, PS was also the most common CHD in Pinschers, in which the only other congenital heart disease  
225 observed was PDA (Table 2).

226 In Tables 3 and 4, the frequency of the most common CHDs by sex are reported for the purebreds and crossbreds,  
227 respectively.

228 **Table 3. Distribution of CHDs by sex in purebreds.**

229

| CHD                     | N   | Frequency | 95% CI        | Male      | Female    | p-value |
|-------------------------|-----|-----------|---------------|-----------|-----------|---------|
|                         |     |           |               | frequency | frequency |         |
| PS                      | 491 | 35.66     | 33.13 – 38.19 | 41.17     | 29.64     | <0.0001 |
| PDA                     | 408 | 29.63     | 27.22 – 32.04 | 19.47     | 40.73     | <0.0001 |
| SAS                     | 213 | 15.47     | 13.56 – 17.38 | 18.64     | 12.01     | 0.001   |
| AS                      | 80  | 5.81      | 4.57 – 7.05   | 7.51      | 3.95      | 0.005   |
| TD                      | 49  | 3.56      | 2.58 – 4.54   | 3.48      | 3.65      | 0.86    |
| VSD                     | 32  | 2.32      | 1.53 – 3.12   | 2.50      | 2.13      | 0.64    |
| MD                      | 25  | 1.82      | 1.11 – 2.52   | 1.95      | 1.67      | 0.70    |
| DCRV                    | 19  | 1.38      | 0.76 – 2.00   | 1.81      | 0.91      | 0.15    |
| ASD                     | 17  | 1.23      | 0.65 – 1.82   | 1.25      | 1.22      | 0.95    |
| rPDA                    | 12  | 0.87      | 0.38 – 1.36   | 0.56      | 1.22      | 0.19    |
| other CHDs <sup>a</sup> | 31  | 2.25      | 1.47 – 3.04   | 1.67      | 2.89      | 0.48    |

230 Legend: CHDs, congenital heart diseases; PS, pulmonic stenosis; PDA; patent ductus arteriosus; SAS, subaortic  
231 stenosis; AS, aortic stenosis; TD, tricuspid dysplasia; VSD, ventricular septal defect; MD, mitral dysplasia; DCRV,  
232 double chamber right ventricle; ASD, atrial septal defect; rPDA, reverse patent ductus arteriosus.

233 <sup>a</sup> MVS, mitral valve stenosis; BAV, aortic bicuspid valve; AVCD, atrioventricular canal disease; CTD, cor  
234 triatriatum dexter; AVF, aortovenous fistula; PPDH, pericardial peritoneum diaphragmatic hernia; QAV,  
235 quadricuspid aortic valve; AH, aortic hypoplasia; AI, aortic insufficiency; AOr, aortic overriding; APW,  
236 aortopulmonary window; MI, mitral insufficiency; TVS, tricuspid stenosis; TA, truncus arteriosus; Collf,  
237 systemic to pulmonary arterial collateral flow; AC, azygos continuation; ACT, anomalous coronary truncus.

238 **Table 4. Distribution of the CHDs by sex in crossbreds.**

239

| CHDs                   | N  | Frequency | 95% CI        | Male      | Female    | p-value |
|------------------------|----|-----------|---------------|-----------|-----------|---------|
|                        |    |           |               | frequency | frequency |         |
| PDA                    | 82 | 42.93     | 40.32 – 45.55 | 21.62     | 56.41     | <.0001  |
| PS                     | 79 | 41.36     | 38.76 – 43.96 | 58.11     | 30.77     | <0.0002 |
| other CHD <sup>a</sup> | 30 | 15.71     | 13.79 – 17.63 | 20.27     | 12.82     | 0.17    |

240 Legend: CHDs, congenital heart diseases; PDA, patent ductus arteriosus; PS, pulmonic stenosis

241 <sup>a</sup> VSD, ventricular septal defect; SAS, subaortic stenosis; rPDA, reverse patent ductus arteriosus; AS, aortic  
242 stenosis; ASD, atrial septal defect; DCRV, double chamber right ventricle; MD, mitral valve dysplasia; TD, tricuspid  
243 valve dysplasia; AVCD, atrioventricular canal disease; AVCDp, partial atrioventricular canal disease; AVF,  
244 aortovenous fistula.

245

246 In purebreds, PS, SAS and AS were significantly more frequent in males ( $p < 0.005$ ) while PDA was significantly  
247 more frequent in females ( $p < 0.0001$ ) (Table 3).

248 PS and PDA were also the most common cardiac defects in crossbreds, and PDA was detected significantly more  
249 frequently in females, and PS was detected more frequently in males (Table 4).

250 In 189 purebred dogs and in 22 crossbreds, two or more defects were detected. The most frequent association  
251 was among two simple defects (74.4%), and PS was the most frequently detected disease (59.24%). PS was  
252 associated with SAS (22.29%), VSD (19.11%) and PDA (8.28%). SAS was associated with PDA in 8.28% of the dogs  
253 (Table 5).

254

255

256

257

258 **Table 5. Associations of congenital heart defects**

259  
260

| CHD <sub>A</sub>                |                         | N.dogs | %     |
|---------------------------------|-------------------------|--------|-------|
| PS                              | SAS                     | 35     | 22.29 |
| PS                              | VSD                     | 30     | 19.11 |
| PS                              | PDA                     | 13     | 8.28  |
| PS                              | Other CHDs <sup>a</sup> | 15     | 9.55  |
| SAS                             | PDA                     | 13     | 8.28  |
| SAS                             | VSD                     | 5      | 3.18  |
| SAS                             | other CHDs <sup>b</sup> | 10     | 6.37  |
| VSD                             | DCRV                    | 7      | 4.46  |
| VSD                             | other CHDs <sup>c</sup> | 6      | 3.82  |
| ASD                             | AVCD                    | 5      | 3.18  |
| other combinations <sup>d</sup> |                         | 18     | 11.46 |

261

262 Legend: CHD<sub>A</sub>, associated congenital heart diseases; CHD<sub>S</sub>, congenital heart diseases, PS, pulmonic stenosis; VSD,

263 ventricular septal defect; PDA, patent ductus arteriosus;

264 <sup>a</sup> DCRV, double chamber right ventricle; AS, aortic stenosis; ASD, atrial septal defect; TD, tricuspid valve dysplasia;

265 AVF, aortovenosus fistula; PLCVC, persistent left atrial vena cava; TVS, tricuspid valve stenosis;

266 <sup>b</sup> TD, tricuspid valve dysplasia; MD, mitral valve dysplasia; MVS, mitral valve stenosis; BAV, bicuspid aortic valve;

267 PLCVC, persistent left atrial vena cava; QAV, quadricuspid aortic valve; TOF, tetralogy of Fallot

268 <sup>c</sup> PDA, patent ductus arteriosus; ASD, atrial septal defect; MD, mitral valve dysplasia; AOr, aortic overriding;

269 <sup>d</sup> ASD-AS, atrial septal defects – aortic stenosis; ASD-TD, atrial septal defect – tricuspid dysplasia; ASD – AVCD,

270 atrial septal defect-atrioventricular canal defects; PDA-AS, patent ductus arteriosus - aortic stenosis; PDA – ASD,

271 patent ductus arteriosus-atrial septal defect; PDA – TD, patent ductus arteriosus-tricuspid dysplasia; PDA – MVS,

272 patent ductus arteriosus-mitral valve stenosis; PDA – AVF, patent ductus arteriosus- aortovenosus fistula; TD –

273 DCRV, tricuspid dysplasia - double chamber right ventricle; TD – AS, tricuspid dysplasia – atrial septal defect TD

274 – CTD, tricuspid dysplasia- cor triatriatum dexter; TOF – APW, tetralogy of Fallot-aortopulmonary window; AS –

275 BAV, aortic stenosis-bicuspid aortic valve; DCRV - HCM; MVS – TVS, mitral valve stenosis- tricuspid valve stenosis.

276

277 There were 14.2% of dogs affected by a combination of three defects, and PS was the most frequent (61%).

278 Eight dogs showed had four or five single defects, PS was the most frequent; it was detected in all 8 dogs.

279 The Tetralogy of Fallot was found in 21 (10%) dogs; 16 (7.4%) were isolated CHD conditions, and 5 (2.4%) were  
280 dogs affected by two or three single defects (Table 1).

281 A significant and positive relationship between the overall number of CHDs and popularity of breed was  
282 observed, suggesting that the prevalence of CHDs grows as the number of ENCI registered dogs increases ( $r =$   
283  $0.54$ ,  $p= 0.01$ ) [13].

284 The number of the CHDi found in the selected breeds, the OR for the overall CHDi, the popularity of the breeds  
285 and the volatility for each breed are reported in Table 6.

286

287

288

289

290

291

292

293

294

295

296

297

298

299

300

301

302



303 **Table 6. Number of CHDi, OR referred to overall CHD (with confidence interval), popularity, and volatility in**  
304 **each breed**

305

| Breed                  | CHDi | OR                 | p value | t <sub>i</sub> | v <sub>i</sub> |
|------------------------|------|--------------------|---------|----------------|----------------|
| Chihuahua              | 6    | 0.90 (0.65 – 1.24) | 0.593   | 51457          | 13             |
| American Staffordshire | 6    | 0.89 (0.61 – 1.28) | 0.6586  | 38859          | 11             |
| Border Collie          | 7    | 0.70 (0.46 – 1.07) | 0.120   | 36973          | 11             |
| French Bulldog         | 10   | 6.98 (5.60 – 8.71) | 0.000   | 15855          | 10             |
| Cavalier King Charles  | 3    | 2.29 (1.59 – 3.29) | 0.000   | 15904          | 9              |
| Golden retriever       | 10   | 0.55 (0.40 – 0.75) | 0.000   | 86696          | 7              |
| English Bulldog        | 12   | 2.74 (2.14 – 3.51) | 0.000   | 30417          | 6              |
| Labrador retriever     | 10   | 0.22 (0.15 – 0.31) | 0.000   | 154498         | 4              |
| Dachshund              | 7    | 0.53 (0.34 – 0.80) | 0.001   | 49035          | 4              |
| Miniature Pinscher     | 5    | 5.60 (3.84 – 8.15) | 0.000   | 6127           | 3              |
| Cocker Spaniel         | 5    | 0.84 (0.57 – 1.23) | 0.419   | 38247          | 2              |
| Dogue de Bordeaux      | 7    | 2.02 (1.33 – 3.09) | 0.003   | 13130          | 2              |
| Maltese dog            | 5    | 2.30 (1.74 – 3.05) | 0.000   | 27179          | 2              |
| Poodle                 | 6    | 1.18 (0.84 – 1.65) | 0.352   | 35703          | 0              |
| Bull Terrier           | 8    | 1.61 (1.03 – 2.50) | 0.045   | 14974          | -2             |
| German shepherd        | 13   | 0.32 (0.26 – 0.38) | 0.000   | 386970         | -3             |
| Rottweiler             | 15   | 0.52 (0.38 – 0.70) | 0.000   | 93858          | -4             |
| Boxer                  | 14   | 4.01 (3.50 – 4.61) | 0.000   | 97670          | -4             |
| Doberman               | 4    | 0.66 (0.46 – 0.96) | 0.029   | 51524          | -7             |
| Newfoundland           | 7    | 2.88 (2.11 – 3.92) | 0.000   | 17924          | -10            |
| Yorkshire terrier      | 6    | 0.94 (0.62 – 1.42) | 0.918   | 29099          | -10            |

306

307 Legend: CHDi, isolated congenital heart diseases; t<sub>i</sub>, popularity; v<sub>i</sub>, volatility.

308

309 Chihuahuas, American Staffordshire Terriers, Border Collies, French Bulldogs and Cavalier King Charles Spaniels

310 were the most popular small and medium breeds, and all of these breeds showed a high value of volatility (Table

311 6). The probability of detecting a CHDi at first presentation is significantly elevated in French Bulldogs, Cavalier

312 King Charles Spaniels, English Bulldogs and Miniature Pinschers (Table 6). Large breeds, including as Boxers and

313 German Shepherds, on the contrary, demonstrated a decrease in volatility along the same period of time, even

314 though the popularity of the breeds is higher than that found in small and medium breeds (Table 6).

315

316

317 To the best of our knowledge, this is the longest epidemiological study on CHDs performed in dogs from a single  
318 referral center.

319 The clinic involved in this study is a valuable site from which to monitor the evolution of trends among different  
320 breeds because it has been a referral center for CHDs studies in the authors' country since 1997 and is based in  
321 a large city in the northern part of the country. In accordance with other studies, PS, PDA, SAS and AS were the  
322 most common CHDs in the purebred population, PDA and PS were prevalent in crossbreds, and in both groups,  
323 males were significantly more frequently affected by CHDs than females [4-9,27]. There were, however, some  
324 differences concerning the prevalence of CHDs in the different breeds. The most common CHD in this study  
325 proved to be PS, as a single or complex defect, associated with SAS (22.29%), VSD (19.11%), PDA (8.28%) and less  
326 common CHDs (9.55%) (Tables 1 and 5). The main breeds affected by all Types of PS were brachycephalic breeds.  
327 English Bulldogs (88.1%) and French Bulldogs (82%), had the greatest prevalence of PS from the beginning of the  
328 study, and the prevalence increased over time as the Boxer PS prevalence decreased (Fig 2).

329 **Figure 2 - Probability of identifying Pulmonic Stenosis in Boxers, French Bulldogs and English Bulldogs**  
330 **admitted from 1997 to 2017.** Abbreviation: Probability, P.

331 The most common PS Types found in the aforementioned breeds were Type A in French Bulldogs (42.25%), Type  
332 A equal to Type B in English Bulldogs (40.68%) and Type A in Boxers (59.14%).

333 In Boxers, only Types A and B of PS were found, while other Types were found in French Bulldogs (PS Type BHG  
334 12.68%; PS Type M 15.49%) and in English Bulldogs (PS Type BHG, PS Type M and PS Type MHG, all together  
335 18.64%)[15]. Although most common in English Bulldogs, PSR 2ACA was also found in French Bulldogs, Brussels  
336 Griffons, American Staffordshire Terriers and Corso dogs [20].

337 The probability of admitting a Boxer affected by PS decreased from 1997 (35%) to 2017 (23.8%) in the overall  
338 population of the RC (Fig 2). This result can be explained as an effect of the screening program that has been in  
339 effect since 2000 in the RC. In collaboration with BCI and FSA, the screening program collected, in a separate  
340 database, the individual phenotypic information on the traits leading to a PS diagnosis, which then gradually led  
341 to a reduction of Boxers affected by PS [18,28]. The increased number of veterinary centers qualified to perform

342 the screening before breeding Boxers could also be a reason to explain the reduction of incoming Boxers affected  
343 by PS in the authors' RC.

344 In the last decade, English Bulldogs and French Bulldogs have been dramatically increasing in popularity in our  
345 country, as observed in this study's population. Decreased popularity of Boxers was a trend that was observed  
346 in the results published by other authors and in our clinic, as mentioned above [10,29,30].

347 The factors that influenced the success of brachycephalic breeds are well known by authors in UK, Denmark and  
348 the USA, where many studies have been conducted [30,31]. The lovers of the brachycephalic breeds were less  
349 influenced by health and longevity in terms of breed selection compared with non-brachycephalic dogs' owners.  
350 A variety of different drivers have been identified to explain the popularity of English Bulldogs and French  
351 Bulldogs, including factors that influenced owners' decisions to buy brachycephalic dogs. The breeds'  
352 appearances (large forehead, big eyes, round face, and bulging cheeks), good behavior, deeply affectionate  
353 temperament and good relationships with children have been described as the most important determinants  
354 driving people's desire for these breeds [10,30,31].

355 All of the typical brachycephalic features valued by the owners of Boxers can be found in English Bulldogs and  
356 French Bulldogs; however, the Bulldogs have a breed size more suitable to current lifestyles. The large size of  
357 Boxers could somewhat influence buyers' breed choice and may explain the decline of this breed in our clinical  
358 setting.

359 PS in American Staffordshire Terriers (86.2%) and Golden Retrievers (29.3%) progressively increased from 1997  
360 to 2017; this observation is in contrast with our explanation for the decrease in Boxer popularity regarding their  
361 size. In fact, even if the breeds are medium or large in size, they are very different from Boxers, not  
362 interchangeable, and their success was because they became fashionable. For example, American Staffordshire  
363 Terriers, are a status symbol among some young people groups' in large European cities, and the success of  
364 Golden Retrievers was due more to the influence of movies (Fig 3) [12].

365 **Figure 3 - Probability of identifying Pulmonic Stenosis in Boxers and other large breeds (American Staffordshire**  
366 **Terrier; Golden Retriever; German Shepherd; Rottweiler) admitted from 1997 to 2017.** Abbreviation:

367 Probability, P.

368 Since 1963 (The Incredible Journey - Walt Disney) to 2017 (A Dog's Purpose - Lasse Hallström), Golden Retrievers  
369 have been movie stars, which is a well-known reason to explain the increasing popularity of the breed in a social  
370 context, and many studies have been performed to explain how media can influence a buyer's choice [10-12].  
371 PDA was the second most common CHD in our population, in both pure and crossbred dogs. The presence of  
372 PDA was significant in females; therefore, a penetrant autosomal recessive and sex-linked inheritance can be  
373 excluded [23]. Although PDA was absent in Boxers, our results indicate the prevalence of PDA was higher than in  
374 studies performed in United States and Europe [4-7]. In our study population, PDA was the 2<sup>nd</sup> most commonly  
375 observed CHD; it was frequent in large dog breeds including Dobermanns (89.7%), German Shepherds (65.9%),  
376 and Newfoundland (42.9%), as well as in medium and small breeds such as Border Collies (59.1%), Maltese  
377 (76.5%), Poodles (65.7%), CKCS (60%) and Chihuahuas (59%). The highest frequency of PDA was observed from  
378 2006 to 2011, and then decreased [5,6,9,33,34]. The reason for the change in the frequency of PDA in that period  
379 of time could be explained by the use of Amplatz Canine Duct Occluder, which is suitable for large breed dogs  
380 and that became available in our center in 2006 (Fig 4) [35].

381 Figure 4 - **Probability of identifying Patent Ductus Arteriosus in large breeds (Bull Terrier; Dobermann; Golden**  
382 **Retriever; Labrador Retriever; Newfoundland; Rottweiler) admitted from 1997 to 2017.** Abbreviation:

383 Probability, P.

384 Nine cases of rPDA were found in Maltese; it is a very uncommon CHD, and in Maltese has only been described  
385 in a publication issued from the same RC in 2011 [9].

386 SAS was the 3<sup>rd</sup> most common defect in our study, as a single defect or associated with PS or PDA (8.28%). SAS  
387 was found in 72.7% of the Dogue de Bordeaux admitted to the RC from 1997 to 2017, and Type 2 and Type 3  
388 were the most frequent (36.36% each) (Tables 1,2,5).

389 The three different subtypes were quite equally distributed in Boxers as Type 1 (39.6%), Type 2 (36.63%) and  
390 Type 3 (23.76%). It is interesting to note that SAS was the 2<sup>nd</sup> most common CHD in our population from 1997 to  
391 2011, and then its frequency decreased through 2017. SAS and PS are very commonly associated with each other

392 in Boxers (85.8%), and the screening program at this center was aimed to reduce the incidence of both (Fig 4).  
393 The reduction of SAS in Boxers is an interesting result because it demonstrates the effectiveness of the screening  
394 and breeding program in Boxers. In other words, the increased prevalence of PS in 20 years is not a failure of the  
395 Boxer screening and breeding program, but rather the result of the large increase in fashion breeds, such as the  
396 French Bulldog, English Bulldog and American Staffordshire Terrier, that are not screened.

397 AS was the 4<sup>th</sup> most common CHD in our population. AS was significantly more frequent in males (7.51% CI 4.57–  
398 7.05,  $P < 0.005$ ) (Table 3) than in females, and Bull Terriers were the most affected breed (30%) (Table 2).

399 The dogs diagnosed with AS were older than the dogs affected by other CHDs, and the extreme ages at  
400 presentation were 50 months (AS) and less than 12 months (TOF) (Fig 1). This result is not surprising because  
401 defects of greater severity are associated with the worst symptoms at an early age. Indeed, in many cases, AS is  
402 mild in young dogs and becomes progressively worse with age. The murmur in AS can be very soft and necessitate  
403 Doppler echocardiographic examination for definitive diagnosis, which is a very different clinical scenario from  
404 TOF [5,36].

405 Many complex defects were found in our population, and PS was the most common CHD detected in association  
406 with the other CHDs (SAS, VSD, PDA) (Table 5). The overall prevalence of the PS-SAS association in Boxers (85.8%)  
407 seems very high; however, the value has been estimated over the 20-year period (Fig 5). SAS-PDA was very  
408 common in Newfoundland; this complex CHDs was found in the 84.6% of the admitted dogs belonging to this  
409 breed (Fig 5).

410 **Figure 5 - Associated congenital heart defects admitted from 1997 to 2017.** Abbreviation: PS, pulmonic

411 stenosis; SAS, subaortic stenosis; VSD, ventricular septal defect; PDA, patent ductus arteriosus, DCRV, double  
412 chamber right ventricle; ASD, atrial septal defect; AVCD, atrioventricular canal disease.

413 PDA and SAS are also very common as simple defects in Newfoundland (Table 2), and the detection of one CHD  
414 should be cause for investigation of the other CHDs, in order to exclude the presence of both. The left ventricle  
415 volume overload due to a large PDA could cause the overestimation of the severity of SAS. In this case, the  
416 correction of PDA determines the reduction of the volume overload, and because the gradient across the aortic

417 valve decreases significantly, the actual severity of subaortic stenosis can be evaluated only after the ductal  
418 closure.

419 Knowing the association among simple CHDs and the breeds involved could be a useful diagnostic tool that  
420 should be taken into account in clinical practice.

421 From 1997 to 2017, several changes have occurred in the clinical and diagnostic approaches to CHDs. The  
422 evolution of diagnostic technology, the changing criteria in the classification of some congenital heart diseases,  
423 and the increased attention to the selection of breeds prone to CHDs has modified the epidemiological conditions  
424 of CHDs in the study RC.

425 In the final section of the study, the relationships among the popularity, volatility and number of CHDs in  
426 individual breeds were investigated over a 20 year time period.

427 The analyses of the popularity of the breeds found that the number of CHDs detected in a breed increases with  
428 the number of registrants of that breed in the ENCI database. This result can be explained by the response to a  
429 growing market demand. In this case, the objective of some breeders is to increase the number of puppies of the  
430 breed, and little attention is paid to the gene pool strength, to the selection of the ascendants and to a  
431 trustworthy breeding program.

432 Recent studies indicate that breeds with more inherited disorders have become more popular, not less popular,  
433 suggesting that health considerations have been secondary in people's decision to acquire a specific breed of  
434 dog [11,14].

435 Volatility is the average absolute annual change in ENCI registration of dogs belonging to a breed, and it was  
436 found to be independent from some breed features (e.g., longer life, inherited genetic disorders, health  
437 problems). Societal influences (fashions and fads) have been described as having a primary effect on the  
438 popularity of companion breeds, and the volatility of the breeds is an interesting parameter to measure the  
439 change in breed popularity over time. The volatility of the French Bulldog was very high (0.10), and the OR of  
440 disease was also high (6.98 CI 5.60 – 8.71). In contrast, the volatility of German Shepherds was very low (-0.03)  
441 even though the number of registrations of German Shepard puppies is the highest in 20 years among the breeds

442 in our study population. This observation is in accordance with the results obtained by other authors that found  
443 that social influence has been more important than functional traits (e.g., health and trainability) in determining  
444 owners' choice of a breed [11,37].

445 Breed size is thought to be a very important trait behind the owner's decision to choose a breed. This observation  
446 is well supported by the volatility values, with significantly lower or more negative values for large breed dogs,  
447 and significantly more positive values for small or medium breed dogs. Chihuahuas, French Bulldogs and CKCS  
448 were the most valued small breeds. Among medium size breeds, the Border Collie and American Staffordshire  
449 Terrier showed the highest volatility.

450 However, size was not the only parameter that influenced the popularity of a breed; Yorkshire Terriers and  
451 Maltese showed a very low volatility despite their small size.

452 The influence of media, including movies, television and radio, on the audience is well known and described<sup>10-12</sup>.  
453 Unfortunately, people may choose dog breeds based on this media influence and on the idea that a breed is  
454 fashionable or a status symbol. These dog owners may not care about the social context in which it should be  
455 introduced or the health problems from which a breed may suffer.

456 The limitations of this study were primarily associated with its retrospective nature; some cases could not be  
457 included because of a lack of clinical and diagnostic information. In particular, the absence of information about  
458 the prevalent breeds in crossbred dog has been a limitation in identifying relationships between breed and CHD  
459 in this class of dogs. A bias could also arise because the study was conducted in a single cardiological referral  
460 center that specializes in the surgical or percutaneous repair of PS, PDA, VSD and ASD, and this center has been  
461 unique in our country for a long period of time. This specialization of this particular center is the reason why CHD  
462 and some breeds (e.g., Boxer, German Shepherd) are overrepresented in our study population. However, this  
463 specialization could also be a point of strength because any variation in the preferences of breeds can be  
464 monitored from a consistent study location.

## 465 **Conclusions**

466 In conclusion, this study allowed us to evaluate the Boxer screening program for CHDs, whose success is  
467 evidenced by the decreased prevalence of SAS and PS in this breed.

468 However, the paradox that people buy breeds of dog that are predisposed to congenital heart diseases was also  
469 evidenced in our study, and, as reported elsewhere, fashions and trends influence many individual choices  
470 [11,12,29,30]. The owners are not often fully aware of the potential problems their dog may face prior to  
471 acquisition of a dog [31,32]. It is also possible that owners do not perceive the clinical signs of some inherited  
472 cardiac disorders as problems, but rather as normal, breed-specific characteristics (e.g., murmur in CKCS).

473 In general, when choosing a breed, owners may consider other characteristics to be more important than dog  
474 health. Nevertheless, the authors think that an effective breeding program should start with educating the  
475 owners about the health problems of a breed. If the owners are not motivated to buy a healthy breed, then  
476 breeds with inherent health problems will be perpetuated, and the motivation of breeders to address health  
477 problems in their breed reduced.

478 In this context, the importance of creating a network of veterinary cardiology centers that monitor the  
479 distribution of a breed and treat the problem of CHDs using the same clinical approach and diagnostic procedures  
480 is clear. This approach could be a useful instrument to provide breeders with effective support in implementing  
481 the breeding program in order to control the diffusion of CHDs, without impoverishing the genetic pool.

## 482 **Acknowledgments**

483 The authors thank Dr.Fabrizio Crivellari (Executive Director), Dr. Dino Muto (President) and Dr. Selene Festa, for  
484 providing the Italian Kennel Club (ENCI) dataset essential in this study.

## 485 **References**

486 1.Bellumori TP, Famula TR, Bannasch DL, Belanger JM, Oberbauer AM. Prevalence of inherited disorders among  
487 mixed-breed and purebred dogs: 27,254 cases (1995–2010). J Am Vet Med Assoc 2013; 242:1549–55



- 488 2.Detweiler DK, Patterson DF, Hubben K, Botts RP. The prevalence of spontaneously occurring cardiovascular  
489 disease in dogs. *AJPH* 1961; 51: 229-41
- 490 3.Detweiler, DK, Patterson DF. Prevalence and types of cardiovascular disease in dogs. *Ann NY Acad Sci* 1965;  
491 127:481-6
- 492 4.Hunt GB, Church DB, Malik R, Bellenger CR. A retrospective analysis of congenital cardiac anomalies (1977–  
493 1989). *Aust Vet Pract* 1990; 70–5.
- 494 5.Tidholm A. Retrospective study of congenital heart defects in 151 dogs. *J Small Anim Pract* 1997; 38: 94–8
- 495 6.Buchanan JW. Prevalence of cardiovascular disorders. In: Fox PR, Sisson DD, Moise NS. In: *Textbook of Canine*  
496 *and Feline Cardiology*, 2nd ed. Philadelphia, PA: WB Saunders Company, 1999:458-63
- 497 7.Baumgartner C, Glaus TM. Congenital cardiac diseases in dogs: A retrospective analysis. *Schweiz Arch Tierheilkd*  
498 2003;145: 527–36.
- 499 8.MacDonald KA. Congenital heart diseases of puppies and kittens. *Vet Clin North Am Small Anim Pract* 2006;  
500 36:503–31
- 501 9.Oliveira P, Domenech O, Silva J, Vannini S, Bussadori R, Bussadori C. Retrospective review of congenital heart  
502 disease in 976 Dogs. *J Vet Intern Med* 2011; 25: 477–83
- 503 10.Herzog H. Forty-two thousand and one Dalmatians: fads, social contagion, and dog breed popularity. *Society*  
504 *& Animals* 2006; 14: 383-97
- 505 11.Ghirlanda S, Acerbi A, Herzog H, Serpell JA. Fashion vs. function in cultural evolution: the case of dog breed  
506 popularity. *PLOS ONE* 2013; 9: 1-6
- 507 12.Ghirlanda S, Acerbi A, Herzog H. Dog movie stars and dog breed popularity: a case study in media influence  
508 on choice. *PLOS ONE* 2014; 9: 1-5
- 509 13.<http://www.enci.it>
- 510 14.Pyle RL, Patterson DF, Chacko S. The genetics and pathology of discrete subaortic stenosis in the  
511 Newfoundland dog. *Am Heart J* 1976; 92:324–34

- 512 15.Bussadori C, Amberger C, Le Bobinnec G. Guidelines for the echocardiographic studies of suspected subaortic  
513 and pulmonic stenosis. *J Vet Cardiol* 2000; 2:15–22
- 514 16.Bussadori C, De Madron E, Santilli RA, Borgarelli M. Balloon valvuloplasty in 30 dogs with pulmonic stenosis:  
515 effect of valve morphology and annular size on initial and 1-year outcome. *J Vet Intern Med* 2001; 15: 553-8
- 516 17.Bussadori C, Quintavalla C, Capelli A. Prevalence of congenital heart disease in boxers in Italy. *J Vet Cardiol.*  
517 2001; 3:7-11
- 518 18.Bussadori C, Pradelli D, Borgarelli M, Chiavegato D, D’Agnolo G, Menegazzo L, et al. Congenital heart disease  
519 in boxer dogs: results of 6 years of breed screening. *Vet J.* 2009; 2:187-92
- 520 19.Quintavalla C, Guazzetti S, Mavropoulou A, Bussadori C. Aorto-septal angle in Boxer dogs with subaortic  
521 stenosis: an echocardiographic study. *Vet J.* 2010; 3:332-7
- 522 20.Navalo’n I, Pradelli D, Bussadori CM. Transesophageal echocardiography to diagnose anomalous right  
523 coronary artery type R2A in dogs. *J Vet Cardiol* 2015; 17: 262-70
- 524 21.Locatelli C, Spalla I, Oriol D, Sala E, Brambilla PG, Bussadoru C. Pulmonic stenosis in dogs: natural history,  
525 survival and risk factors in a retrospective cohort of patients. *J Small Animal Practice.* 2013; 9: 445–52
- 526 22.Scansen BA. Coronary Artery Anomalies in Animals. *Vet. Sci.* 2017; 20: 1-18
- 527 23.Patterson DF, Haskins ME, Schnarr WR. Hereditary dysplasia of the pulmonary valve in Beagle dogs. *Pathologic*  
528 *and genetic studies. Am J Cardiol* 1981; 47:631–641.
- 529 24.Thomas WP, Gaber CE, Jacobs GJ, Kaplan PM, Lombard CW, Moise NS, Moses BL. Recommendations for  
530 standards in transthoracic two-dimensional echocardiography in the dog and cat. Echocardiography Committee  
531 of the Specialty of Cardiology, American College of Veterinary Internal Medicine. *J Vet Intern Med* 1993;7: 247–  
532 53
- 533 25.Locatelli C, Santini A, Bonometti GA, Palermo V, Scarpa P, Sala E, Brambilla PG. Echocardiographic values in  
534 clinically normal adult Dogue de Bordeaux dogs. *Journal of Small Animal Practice* 2011; 52: 246-53
- 535 26.Ohad DG, Avrahami A, Waner T, David L. The occurrence and suspected mode of inheritance of congenital  
536 subaortic stenosis and tricuspid valve dysplasia in Dogue de Bordeaux dogs. *Vet J* 2013; 2:351-7

- 537 27.Schrope DP. Prevalence of congenital heart disease in 76,301 mixed-breed dogs and 57,025 mixed-breed cats.  
538 J Vet Cardiol. 2015; 17: 192-202
- 539 28.Menegazzo L, Bussadori C, Chiavegato D, Quintavalla C, Bonfanti V, Guglielmini C et al. The relevance of  
540 echocardiography heart measures for breeding against the risk of subaortic and pulmonic stenosis in Boxer dogs.  
541 J Anim Sci. 2012; 90:419–28
- 542 29.Packer RMA, Murphy D, Farnworth MJ. Purchasing popular purebreds: Investigating the influence of breed-  
543 type on the pre-purchase attitudes and behavior of dog owners. Animal Welfare 2017; 5: 1- 40
- 544 30.Sandøe P, Kondrup SV, Bennett PC, Forkman B, Meyer I, Proschowsky HF et al. Why do people buy dogs with  
545 potential welfare problems related to extreme conformation and inherited disease? A representative study of  
546 Danish owners of four small dog breeds. PLOS ONE 2017; 24: 1 - 25
- 547 31.Archer J, Monton S. Preferences for infant facial features in pet dogs and cats. Ethology 2010; 3:217 - 26
- 548 32.Buchanan JW. Causes and prevalence of cardiovascular disease. In: Kirk RW, Bonagura JD, eds. Current  
549 Veterinary Therapy XI: Small Animal Practice. Philadelphia, PA: WB Saunders; 1992:647–655.
- 550 33.Saunders AB, Gordon SG, Boggess MM, Miller MW. Long-Term Outcome in Dogs with Patent Ductus  
551 Arteriosus: 520 Cases (1994–2009). J Vet Intern Med 2014; 28:401–10
- 552 34.Spalla I, Locatelli C, Zanaboni AM, Brambilla PG, Bussadori C. Echocardiographic Assessment of Cardiac  
553 Function by Conventional and Speckle-Tracking Echocardiography in Dogs with Patent Ductus Arteriosus. J Vet  
554 Intern Med 2016; 30:706–713
- 555 35.Marelli AJ, Mackie AS, Raluca Ionescu-Iltu ER, Rahme E, Pilote L. Congenital heart disease in the general  
556 population changing prevalence and age distribution. Circulation 2007; 115:163-172
- 557 36.O’Neill DG, Jackson C, Guy JH, Church DB, McGreevy PD, Thomson PC, et al. Epidemiological associations  
558 between brachycephaly and upper respiratory tract disorders in dogs attending veterinary practices in England.  
559 Canine Genetics and Epidemiology2 2015; 14: 2-10

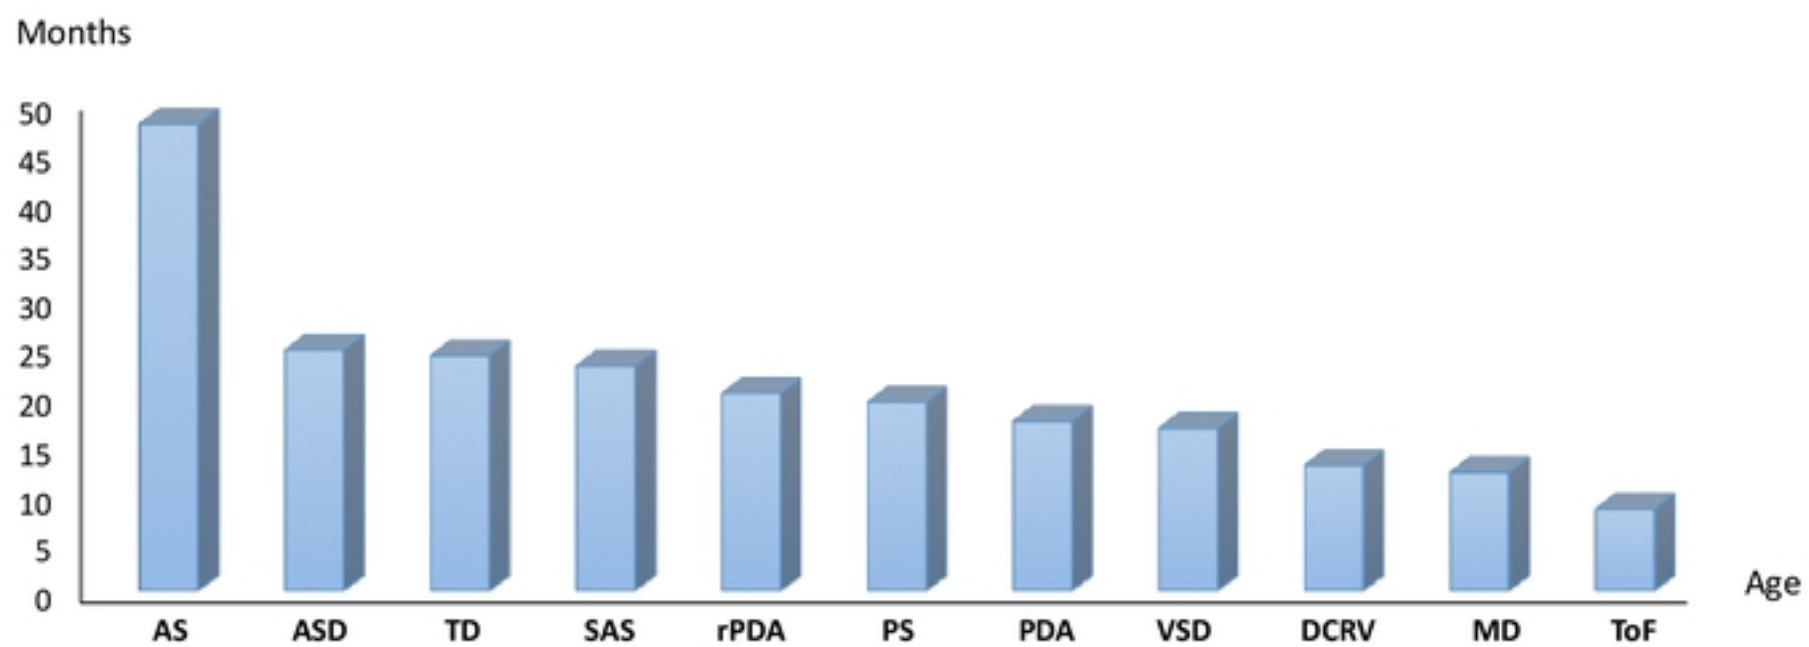

bioRxiv preprint doi: <https://doi.org/10.1101/2020.02.25.964262>; this version posted February 25, 2020. The copyright holder for this preprint (which was not certified by peer review) is the author/funder, who has granted bioRxiv a license to display the preprint in perpetuity. It is made available under aCC-BY 4.0 International license.

Figure 1

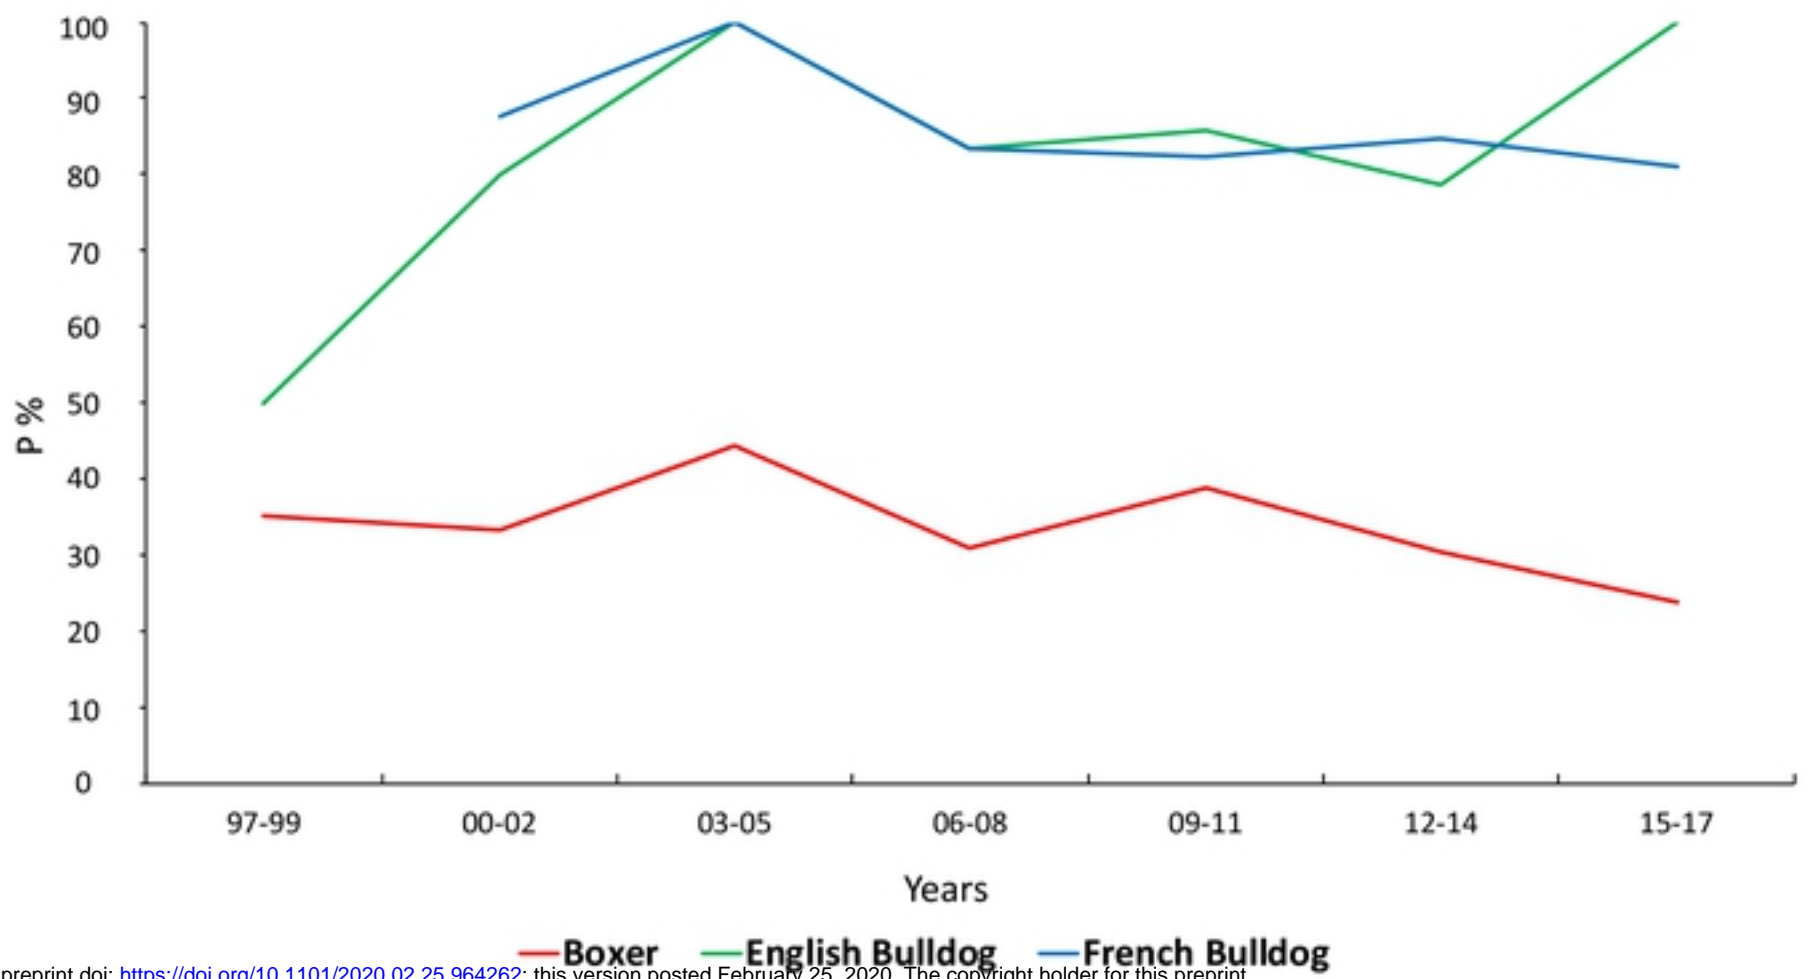

bioRxiv preprint doi: <https://doi.org/10.1101/2020.02.25.964262>; this version posted February 25, 2020. The copyright holder for this preprint (which was not certified by peer review) is the author/funder, who has granted bioRxiv a license to display the preprint in perpetuity. It is made available under aCC-BY 4.0 International license.

Figure 2

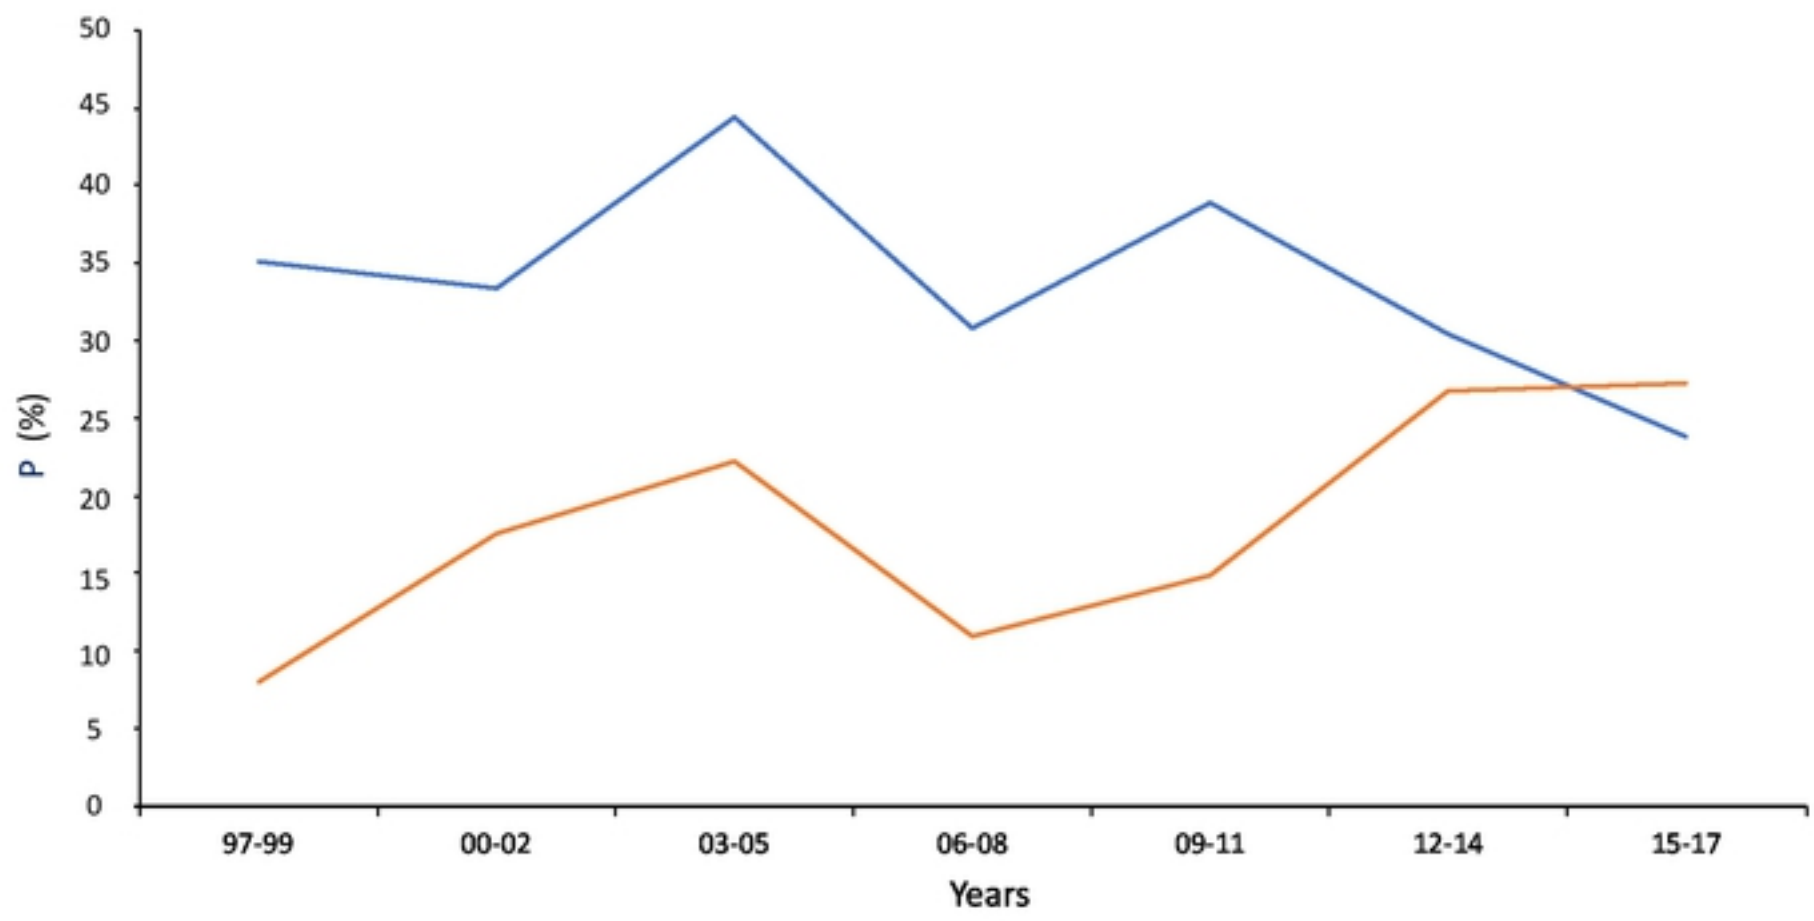

bioRxiv preprint doi: <https://doi.org/10.1101/2020.02.25.964262>; this version posted February 25, 2020. The copyright holder for this preprint (which was not certified by peer review) is the author/funder, who has granted bioRxiv a license to display the preprint in perpetuity. It is made available under aCC-BY 4.0 International license.

Figure 3

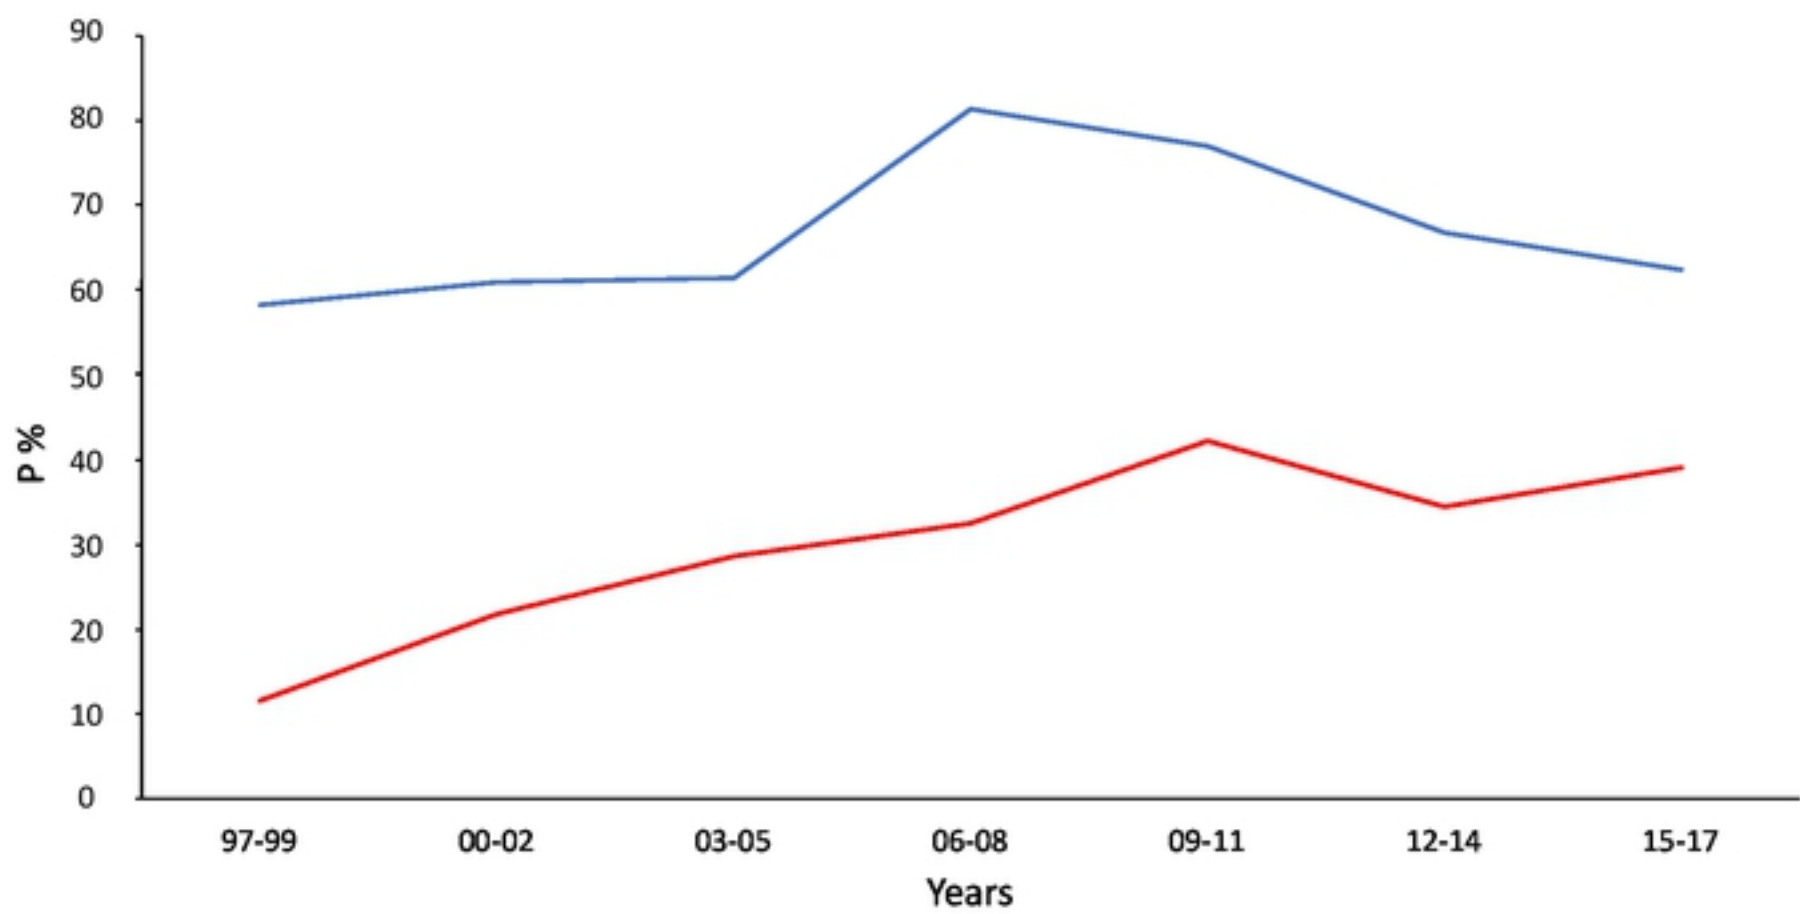

bioRxiv preprint doi: <https://doi.org/10.1101/2020.02.25.964262>; this version posted February 25, 2020. The copyright holder for this preprint (which was not certified by peer review) is the author/funder, who has granted bioRxiv a license to display the preprint in perpetuity. It is made available under aCC-BY 4.0 International license.

Figure 4

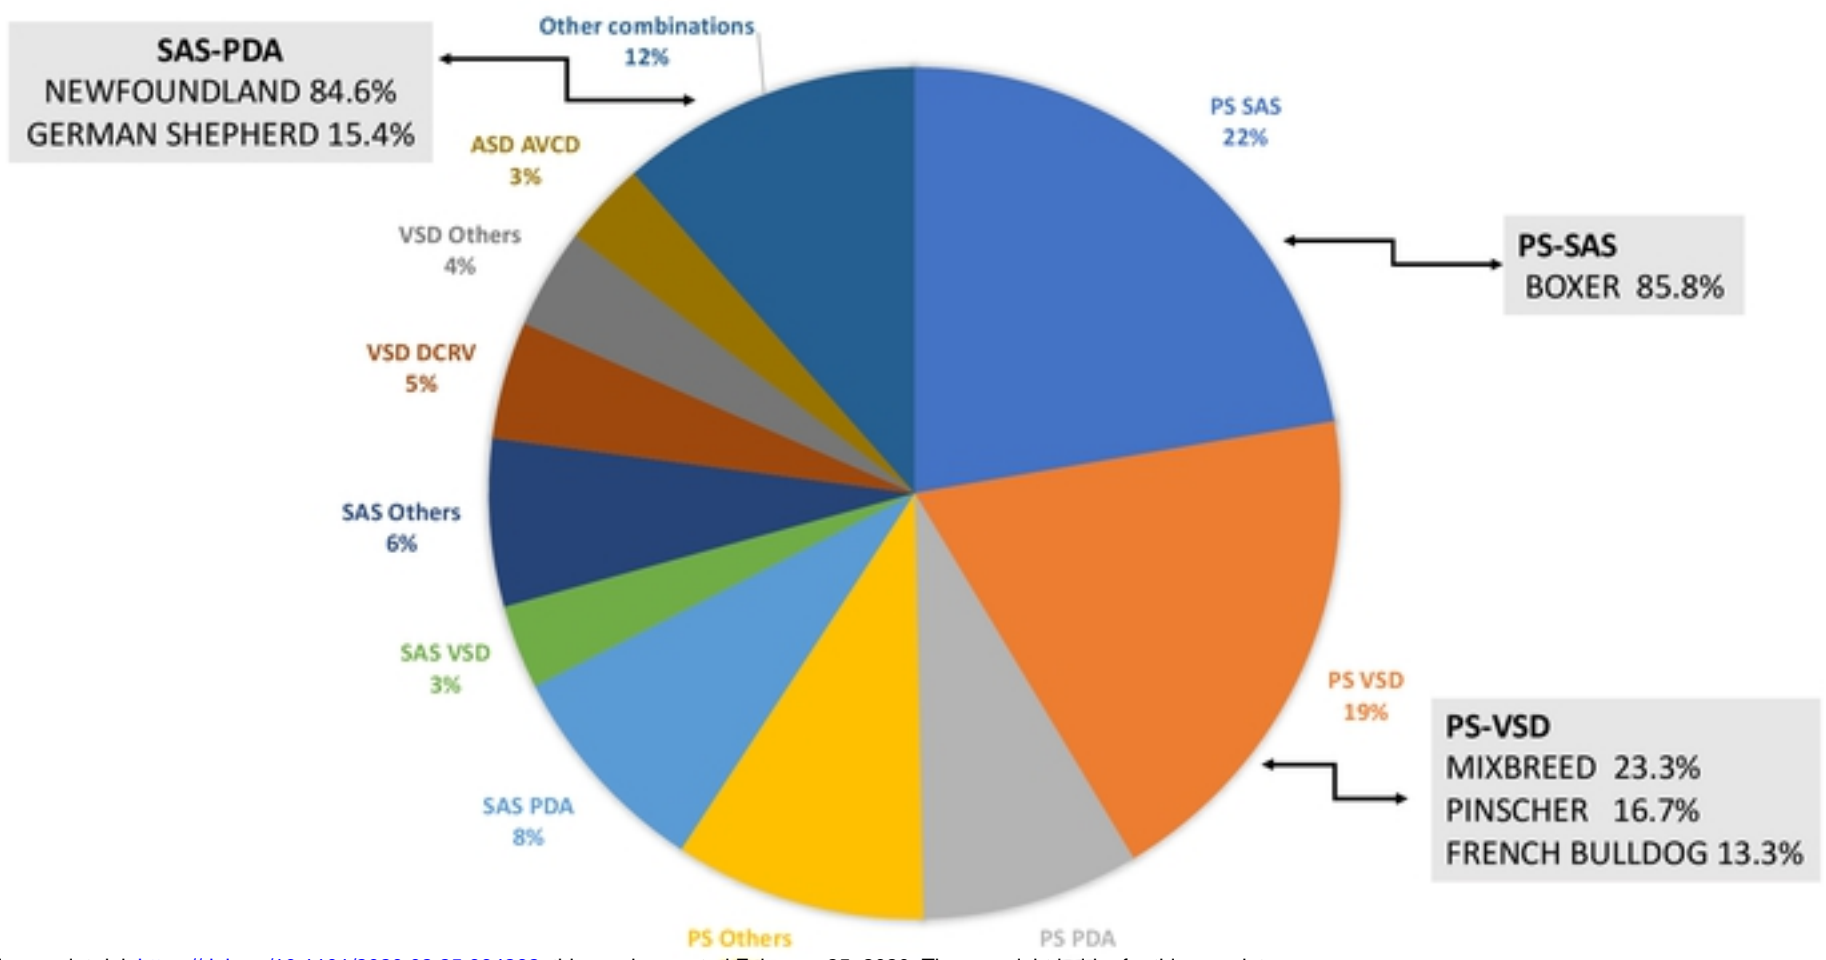

bioRxiv preprint doi: <https://doi.org/10.1101/2020.02.25.964262>; this version posted February 25, 2020. The copyright holder for this preprint (which was not certified by peer review) is the author/funder, who has granted bioRxiv a license to display the preprint in perpetuity. It is made available under aCC-BY 4.0 International license.

Figure 5
